# Supplementary material
Source: publisher figshare collection journal article supplement (https://acs.figshare.com/ndownloader/files/4121593)
Supplement: Supplementary file 1 [file 4121593]

## Supplement

### **Modulation of a pre-existing conformational equilibrium tunes adenylate kinase activity**

Jörgen Ådén<sup>a</sup>, Abhinav Verma<sup>b</sup>, Alexander Schug<sup>b</sup> & Magnus Wolf-Watz<sup>a\*</sup>

*<sup>a</sup>Department of Chemistry, Chemical Biological Center, Umeå University, 901 87 Umeå, Sweden, <sup>b</sup> Steinbuch Centre for Computing, Karlsruhe Institute of Technology, 76131 Karlsruhe, Germany.*

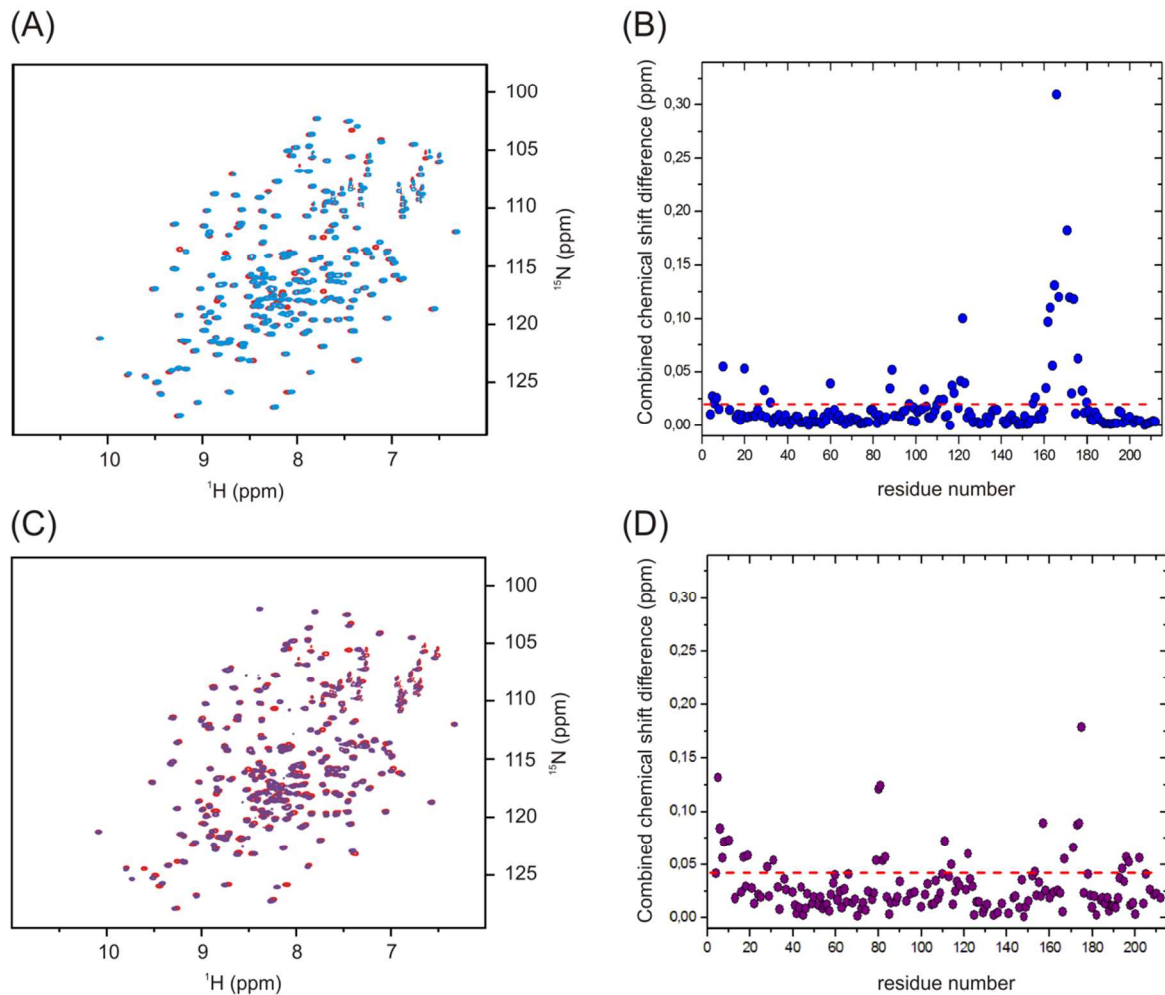

**Figure S1.** NMR spectra of mutational- and osmolyte perturbed AK<sub>ecc</sub>. **(A)** Overlay of <sup>1</sup>H-<sup>15</sup>N HSQC spectra corresponding to wild type AK<sub>ecc</sub> (red contours) and E170A (blue contours). **(B)** Combined chemical shift perturbations (referenced to wild type AK<sub>ecc</sub>) resulting from the E170A mutation quantified according to:  $\delta\omega = 0.2|\delta^{15}\text{N}| + |\delta^1\text{H}|$  (ppm). **(C)** Overlay of <sup>1</sup>H-<sup>15</sup>N HSQC spectra corresponding to wild type AK<sub>ecc</sub> (red contours) and AK<sub>ecc</sub> with 0.35M TMAO (purple contours). **(D)** Combined chemical shift perturbations of AK<sub>ecc</sub> in 0.35 M TMAO (referenced to AK<sub>ecc</sub> in regular buffer) mutation. The dashed lines in (B) and (D) indicates the threshold value used in Fig. 3.

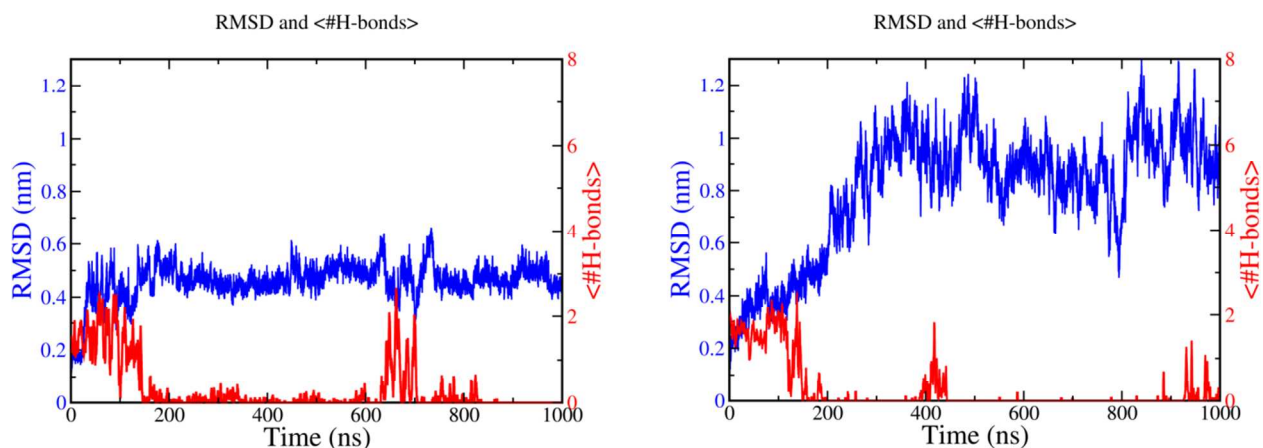

**Figure S2.** Molecular dynamics simulations of the closed to open transition in AK<sub>eco</sub>. RMSD with respect to the initial WT closed state (blue) and average number of hydrogen bonds connecting L58 and E170 (red) are shown for two simulations.

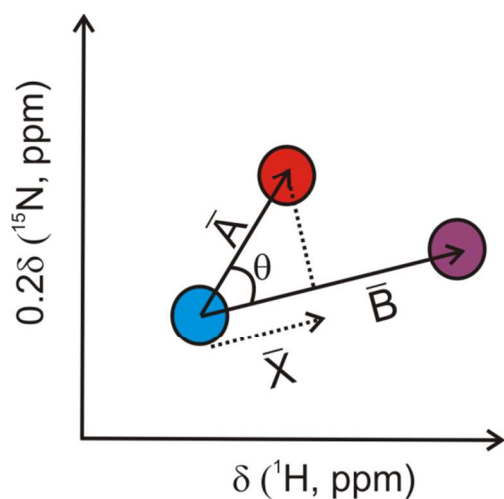

**Figure S3.** Definition of vectors and the projection angle in the chemical shift projection analysis. Chemical shifts are colored according to; blue, E170A; red, AK<sub>eco</sub> and purple AK<sub>eco</sub> with 0.35 M TMAO. The amplitude of the AK<sub>eco</sub> chemical shift vector (A) projected onto the “activation” vector (B) is defined as “X”. The projection angle is defined as “θ”.

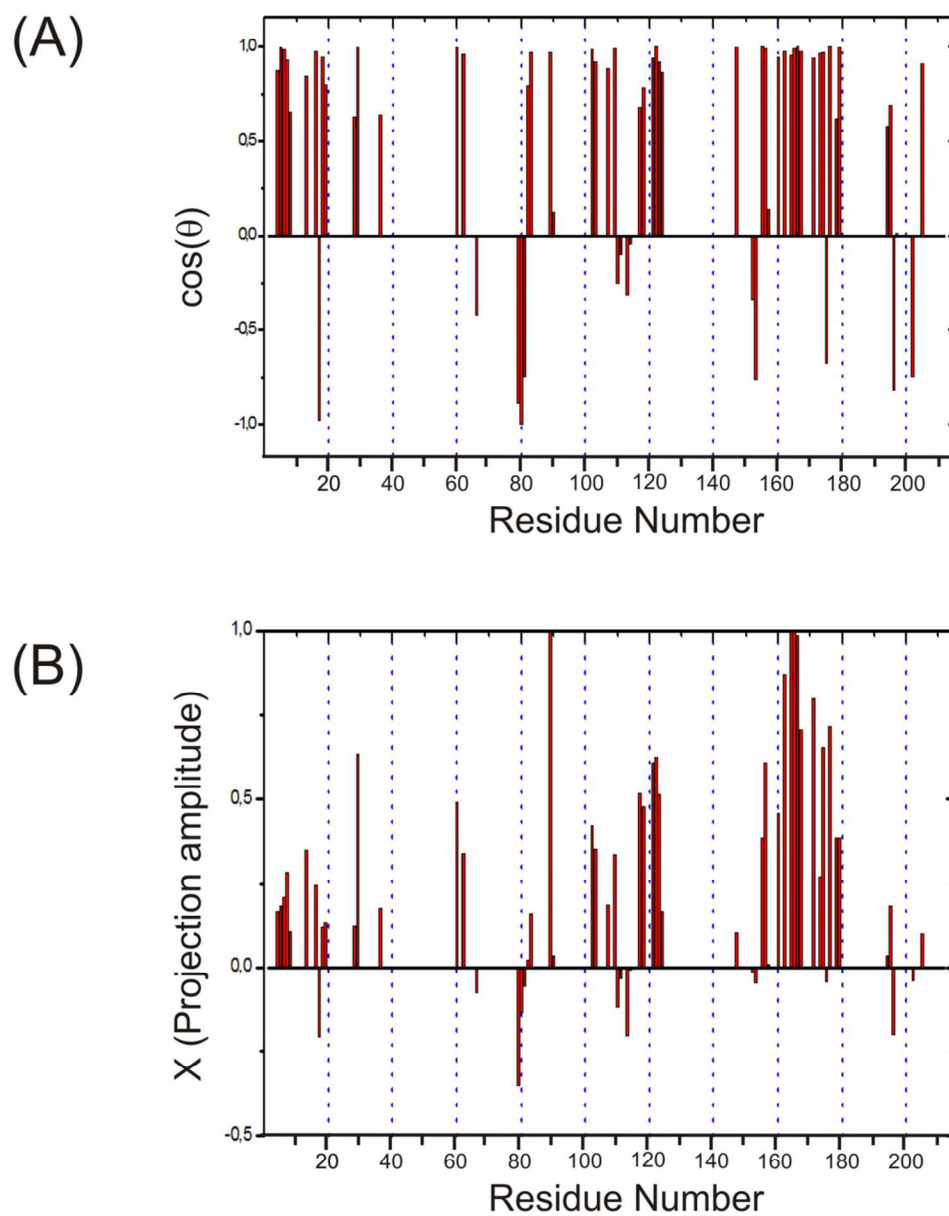

**Figure S4.** Residue specific projection angles ( $\cos\theta$ ) and amplitudes ( $X$ ) from the definition in Figure S3. Residues with a compounded chemical shift difference ( $\delta\omega=0.2|\delta^{15}\text{N}| + |\delta^1\text{H}|$ ) between E170A and AK<sub>eco</sub> with 0.35 M TMAO larger than 0.3 ppm were included in the analysis. (A) Projection angle reported as  $\cos\theta$ . (B) Projection amplitude ( $X$ ).

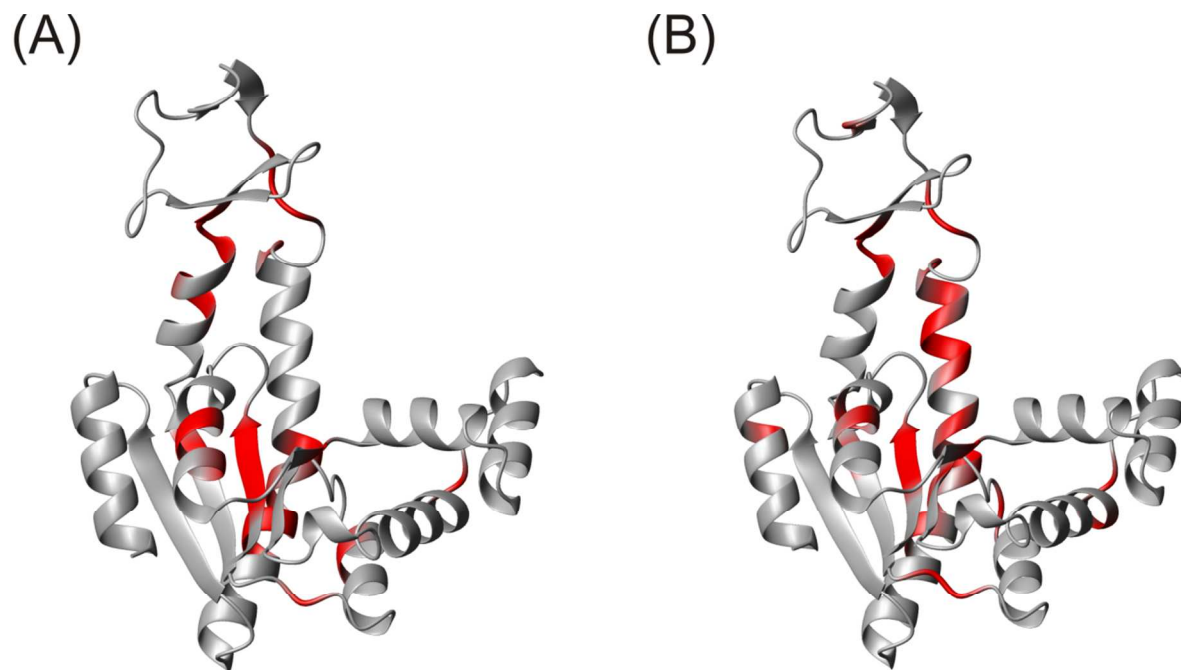

**Figure S5.** Structural distribution of residues identified in the linear correlation- and projection analysis. **(A)** Residues identified from the linear correlation analysis are shown in red on the open  $AK_{eco}$  structure. **(B)** Residues with a projection angle,  $\cos\theta$ , larger than 0.9 are shown in red on the open  $AK_{eco}$  structure.

## Ligand binding in coupled equilibrium reactions

The dissociation constant ( $K_d$ ) for a one to one binding reaction is given by equation (1).

$$K_d = \frac{[E][S]}{[ES]} \quad (1)$$

In (1) E corresponds to enzyme, S to substrate and ES to the enzyme-substrate complex.

For  $AK_{eco}$  the minimal ligand binding mechanism is described by **Fig. 1D**, where the initial open equilibrium complex ( $ES^O$ ) isomerizes to a closed complex ( $ES^C$ ). For this mechanism the apparent binding affinity ( $K_d^{app}$ ) is described by equation (2).

$$K_d^{app} = \frac{[E][S]}{[ES]^O + [ES]^C} \quad (2)$$

The expression in (2) can be simplified into (5) by insertion of (3) and (4) that are definitions of the equilibrium constants for association of substrate ( $K_d$ ) and the subsequent conformational change ( $K_{conf}$ ).

$$K_d = \frac{[E][S]}{[ES]^O} \quad (3)$$

$$K_{conf} = \frac{[ES]^C}{[ES]^O} \quad (4)$$

$$K_d^{app} = \frac{K_d}{1 + K_{conf}} \quad (5)$$

From equation (5) it is evident that  $K_d^{app}$  is modulated by  $K_{conf}$ .

## Hydrogen to deuterium exchange kinetics for L58

The time points are defined as the middle of each  $^1\text{H}$ - $^{15}\text{N}$  HSQC spectrum (acquisition time equal to 26 minutes). The first experiment was started after a dead-time of 11 minutes after sample preparation. Intensities are normalized to the intensity of the first experiment.

| Time (min) | Intensity |
|------------|-----------|
| 24.2       | 1         |
| 50.5       | 0.7       |
| 76.8       | 0.4397    |
| 103.1      | 0.3404    |
| 129.5      | 0.2245    |
| 155.8      | 0.1558    |
| 190.4      | 0.1121    |
| 216.7      | 0.1182    |
| 243.0      | 0.0457    |
| 269.3      | 0.1075    |
| 295.6      | 0.0239    |
| 321.9      | 0.0728    |
| 348.3      | 0.0646    |
| 374.6      | 0.0671    |
| 400.9      | 0.0693    |
| 427.2      | 0.0673    |
| 453.5      | 0.0794    |
| 479.8      | 0.0511    |
| 506.1      | 0.0009    |
| 532.5      | 0.0635    |
| 558.8      | 0.0545    |
| 585.1      | 0.0347    |
| 611.5      | 0.0465    |
| 637.8      | 0.0558    |
| 664.1      | 0.0572    |
| 690.4      | 0.0342    |
| 716.7      | 0.0702    |
| 743.0      | 0.0019    |
| 769.3      | 0.0231    |
| 795.6      | 0.0539    |
| 822.0      | 0.0208    |
| 848.3      | 0.0224    |
| 874.6      | 0.0497    |
| 900.9      | 0.0629    |
| 927.2      | 0.0633    |
| 953.5      | 0.0634    |

|        |        |
|--------|--------|
| 979.8  | 0.0569 |
| 1006.1 | 0.0578 |
| 1032.4 | 0.0741 |
| 1058.8 | 0.0742 |
| 1085.2 | 0.0668 |
| 1111.5 | 0.0086 |
| 1137.8 | 0.0481 |
| 1164.1 | 0.0538 |
| 1190.4 | 0.0475 |
| 1216.7 | 0.0294 |
| 1243.0 | 0.0714 |
| 1269.3 | 0.0379 |
| 1295.7 | 0.0631 |
| 1322.0 | 0.016  |
| 1348.3 | 0.0262 |
| 1374.6 | 0.0476 |
| 1400.9 | 0.0604 |
| 1427.2 | 0.0589 |
| 1453.5 | 0.0685 |
| 1479.8 | 0.0279 |
| 1506.2 | 0.0432 |
| 1532.5 | 0.0608 |
| 1558.8 | 0.0637 |
| 1585.1 | 0.0656 |
| 1611.4 | 0.0542 |
| 1637.7 | 0.0642 |
| 1664.0 | 0.0143 |
| 1690.4 | 0.0767 |
| 1785.1 | 0.0459 |
| 1811.9 | 0.0635 |
| 1838.2 | 0.0424 |
| 1864.6 | 0.037  |
| 1890.9 | 0.0342 |
| 1917.2 | 0.0572 |
| 1943.5 | 0.0504 |
| 1969.8 | 0.0499 |
| 1996.2 | 0.0612 |
| 2022.5 | 0.0522 |
| 2048.8 | 0.0373 |
| 2075.1 | 0.0822 |
| 2101.4 | 0.0276 |
| 2127.7 | 0.0408 |
| 2154.0 | 0.0322 |



|        |        |
|--------|--------|
| 2180.3 | 0.0538 |
| 2206.7 | 0.0603 |
| 2233.0 | 0.0637 |
| 2259.3 | 0.0522 |
| 2285.6 | 0.0231 |
| 2311.9 | 0.0433 |
| 2338.2 | 0.0562 |
| 2364.5 | 0.0234 |
| 2390.8 | 0.0727 |
| 2417.2 | 0.025  |
| 2443.5 | 0.0463 |
| 2469.8 | 0.0714 |
| 2496.1 | 0.0701 |
| 2522.4 | 0.048  |
| 2548.7 | 0.0465 |
| 2575.0 | 0.0464 |
| 2601.3 | 0.0428 |
| 2627.6 | 0.0429 |

---
